# Supplementary material for: Downregulated long non-coding RNA CLMAT3 promotes the proliferation of colorectal cancer cells by targeting regulators of the cell cycle pathway
Source: PubMed Central journal article supplement (PMC5312286; doi:10.18632/oncotarget.10431), 2016-07-06
Supplement: oncotarget-07-58931-s001.pdf [file oncotarget-07-58931-s001.pdf]

## Downregulated long non-coding RNA CLMAT3 promotes the proliferation of colorectal cancer cells by targeting regulators of the cell cycle pathway

### Supplementary Materials

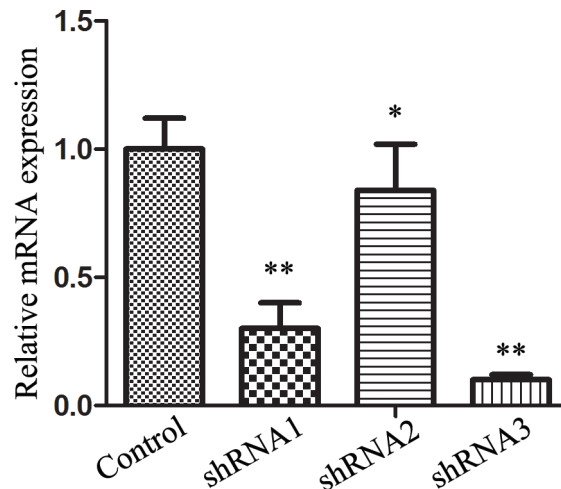

Supplementary Figure S1: Quantitative PCR detection lncRNA-CLMAT3 expression.

### Supplementary Table S1: Primer sequences for lncRNA-CLMAT3

| Gene          |         | Sequences (5'-3')     |
|---------------|---------|-----------------------|
| lncRNA-CLMAT3 | Forward | TCCTTGACCTTTGGATTTGG  |
|               | Reverse | CGACAGAATAACCCGTGGAA  |
| GAPDH         | Forward | TGACTTCAACAGCGACACCCA |
|               | Reverse | CACCCTGTTGCTGTAGCCAAA |

### Supplementary Table S2: shRNA used for silencing the lncRNA-CLMAT3

| shRNA                  | Sequence                                                                   |
|------------------------|----------------------------------------------------------------------------|
| lncRNA-CLMAT3          | 5'-GATCCGAAATGCCATAGCCTGCAATATTCAAGAGATATTGCAGGCTATGGC<br>ATTCTTTTTTG -3'  |
|                        | 5'-AATTCAAAAAAGAAATGCCATAGCCTGCAATATCTCTTGAATATTGCAGGCT<br>ATGGCATTTCG -3' |
| Negative control shRNA | 5'-GATCCGTTCTCCGAACGTGTCACGTTTCAAGAGAACGTGACACGTTCCGA<br>GAACTTTTTTG-3'    |
|                        | 5'-AATTCAAAAAAGTTCTCCGAACGTGTCACGTTCTCTTGAACGTGACACGT<br>TCGGAGAACG-3'     |
